# Supplementary material for: Photocatalytic selective oxidation of biomass-derived 5-hydroxymethylfurfural to 2,5-diformylfuran under ambient conditions over CdIn2S4/g-C3N4 heterojunctions
Source: Royal Society of Chemistry journal article supplement (doi:10.1039/d3cy00794d), 2023-01-01
Supplement: d3cy00794d1.pdf [file d3cy00794d1.pdf]

**Supporting Information:**

**Photocatalytic selective oxidation of  
biomass-derived 5-hydroxymethylfurfural to  
2,5-diformylfuran under ambient conditions  
over CdIn<sub>2</sub>S<sub>4</sub>/g-C<sub>3</sub>N<sub>4</sub> heterojunctions**

*Jifang Cui, Zhihao Yu\*, Linhao Sun, Ming Zhang, Mengyan Guo, Jian Xiong, Yina Qiao, Rui Zhang,  
Xuebin Lu\**

## 1. Experimental details

### 1.1 Characterization of the materials

The X-ray diffraction spectra of the samples were measured on a BRUCKER D8 ADVANCE X model X-ray powder diffractometer from Bruker, Germany, using a Cu target (wavelength  $\lambda = 1.5406 \text{ \AA}$ ), a Co target (wavelength  $\lambda = 1.79026 \text{ \AA}$ ), a scan rate of  $5^\circ/\text{min}$  and a sample scan range of  $5$  to  $80^\circ$  at a current of  $40 \text{ mA}$  and a voltage of  $40 \text{ kV}$ . Afterwards, to further observe the sample structure, the specific internal morphology and microstructure of the samples were observed with a field emission scanning electron microscope (SEM) (Hitachi SU8020). After this, the specific internal morphology and microstructure of the samples were observed with a transmission electron microscope (TEM) (FEI Tecnai G2 F30) at an accelerating voltage of  $200 \text{ kV}$  and analyzed together with the SEM. X-ray photoelectron spectroscopy (XPS) spectral profiles were obtained with a Thermo escalab 250Xi and then analyzed. A QUANTAS EDS X-ray spectrometer from Bruker, Germany, was used to test the microscopic morphology and metal element distribution of the catalysts. Nitrogen adsorption and desorption isotherms were obtained using an ASAP 2460 model physisorption instrument at  $77.3 \text{ K}$ . Before nitrogen adsorption, the samples were degassed at  $200^\circ\text{C}$  for  $12 \text{ h}$ . After completion of the measurements, the specific surface area of the catalyst was calculated by the BET (Brunauer-Emmett-Teller) method, and the pore size of the catalyst was calculated by the BJH (Barrett-Joyner-Halenda) method. Photoluminescence Spectroscopy (PL) was carried out on an FLS1000/FS5 model steady-state transient fluorescence spectrometer with an excitation wavelength of  $380 \text{ nm}$ . The characteristic functional group identification of the catalysts was tested using a Nicolet IS10 model infrared spectrometer manufactured by Nicolet, USA. The resolution of the spectrometer was  $4 \text{ cm}^{-1}$  and the signal to mania ratio was  $50000:1$  with  $32$  scans. The wave number range was  $400\text{-}4000 \text{ cm}^{-1}$ . Sample preparation was carried out using KBr compression (tableting method), where the sample and KBr were mixed and ground in an agate mortar body at a mass ratio of  $120:1$ , then compressed, and the resulting homogeneous tablets were used for analytical testing. Cyclic experiments were carried out to prepare DFF by photocatalytic oxidation of HMF using a composite catalyst under the same reaction conditions. At the end of each reaction, the catalyst was separated from the solution using high-speed centrifugation, followed by continued centrifugation with water washing three times and alcohol washing three times, and the final separated solids were recovered by drying them in a vacuum drying oven at  $60^\circ\text{C}$  for  $12 \text{ h}$ , and then the reaction was continued.

## 2. Supporting Figures and Tables

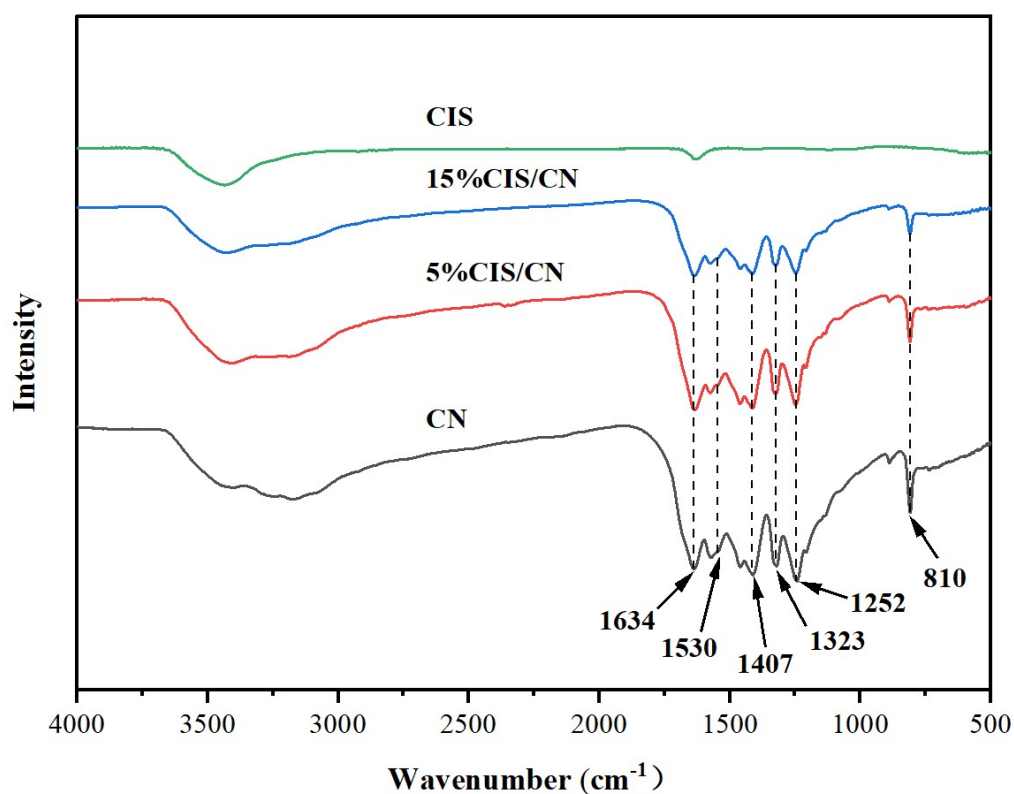

Figure S1. FT-IR spectra of catalysts  $\text{g-C}_3\text{N}_4$  (CN),  $\text{CdIn}_2\text{S}_4$  (CIS) and the composite catalysts 5%CIS/CN, 15%CIS/CN

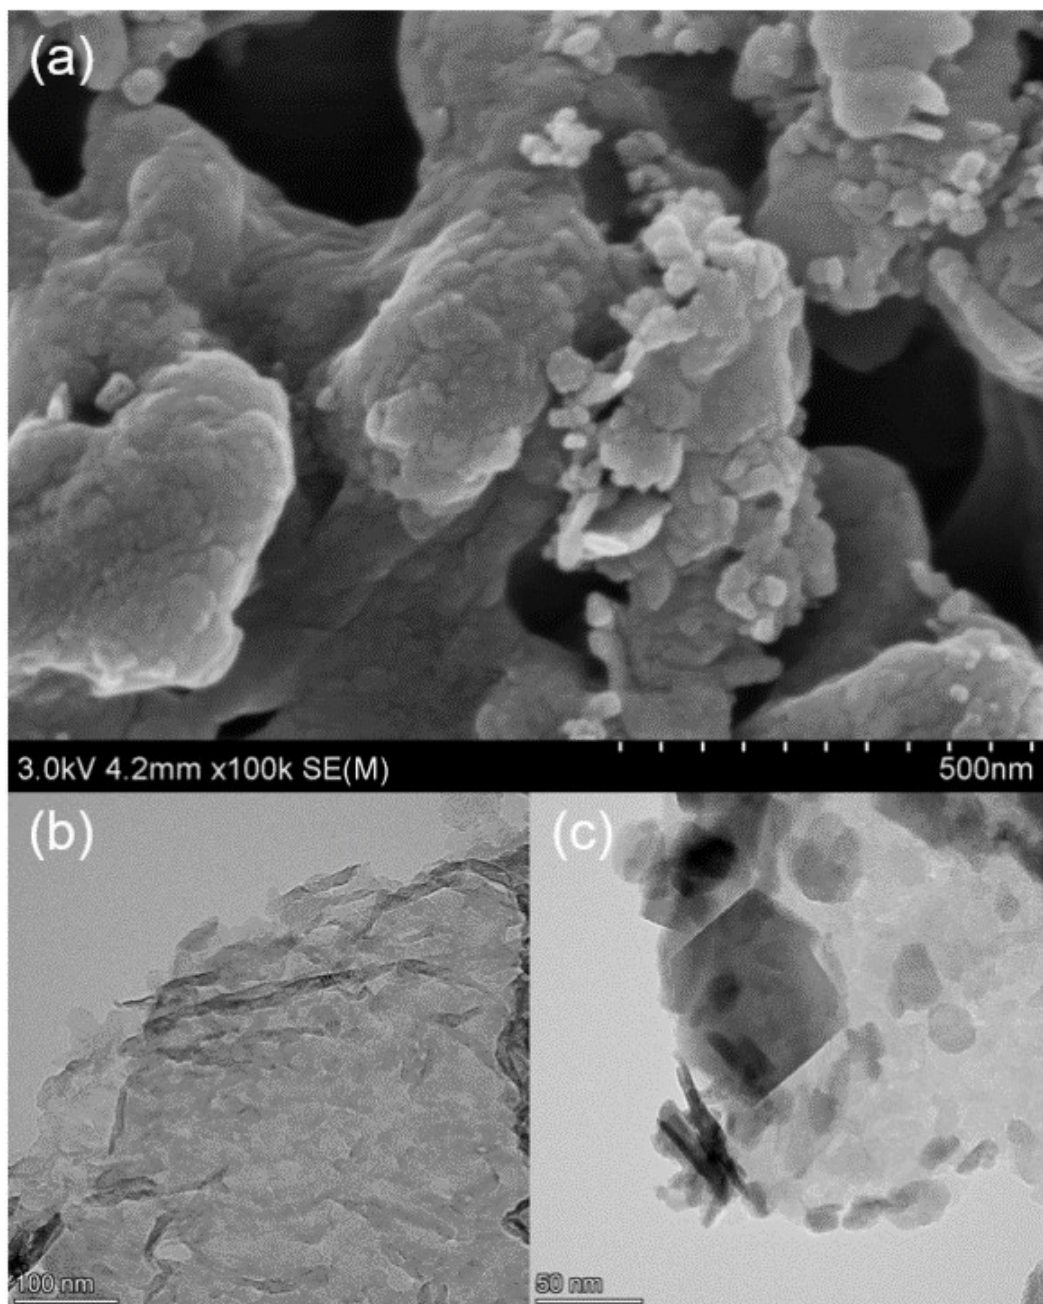

Figure S2. (a) SEM image of the mesoporous structure of g-C<sub>3</sub>N<sub>4</sub> synthesized by secondary calcination. (b) SEM image of the microwave-synthesized sheet CdIn<sub>2</sub>S<sub>4</sub>. (c) TEM image of CdIn<sub>2</sub>S<sub>4</sub>/g-C<sub>3</sub>N<sub>4</sub>.

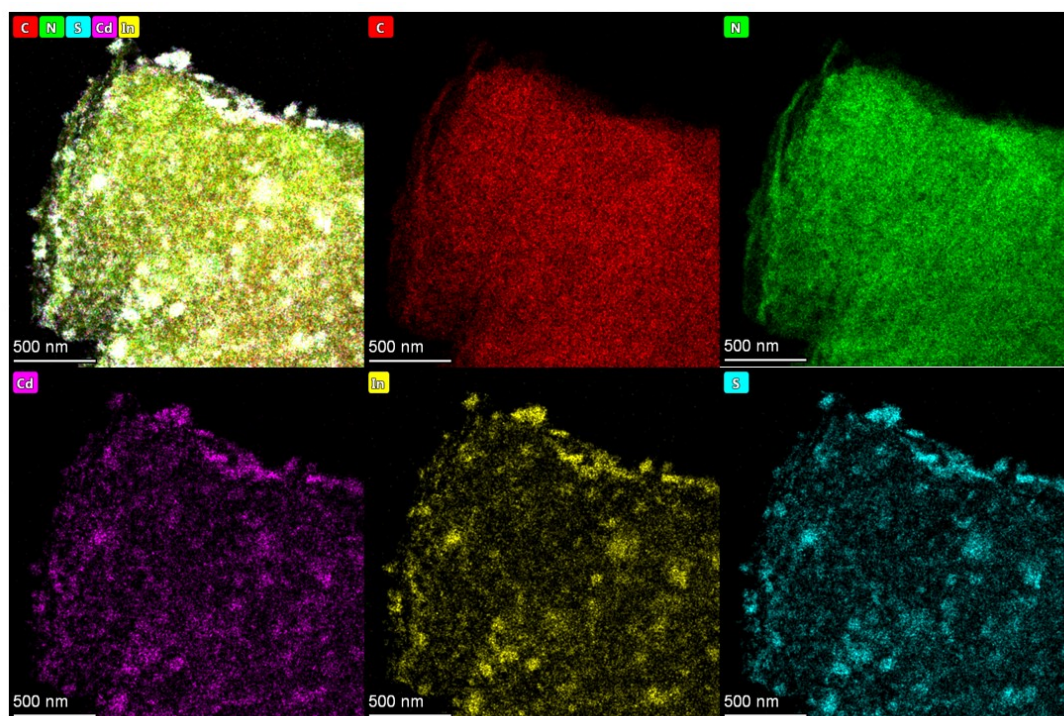

Figure S3. Elemental mapping images of N, C, In, Cd, and S in CdIn<sub>2</sub>S<sub>4</sub>/g-C<sub>3</sub>N<sub>4</sub>.

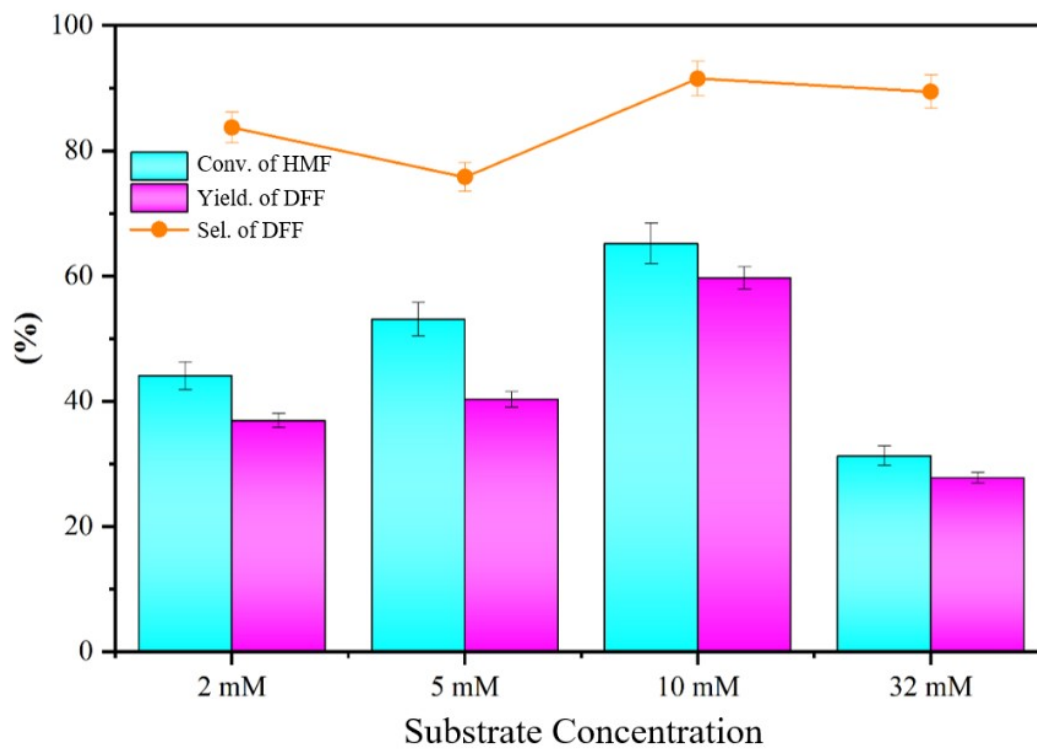

Figure S4. Effect of substrate concentration on reaction performance (reaction conditions: 40 mg of 15% CIS/CN as a catalyst, 5 mL of water as the solvent, 6 h reaction time)

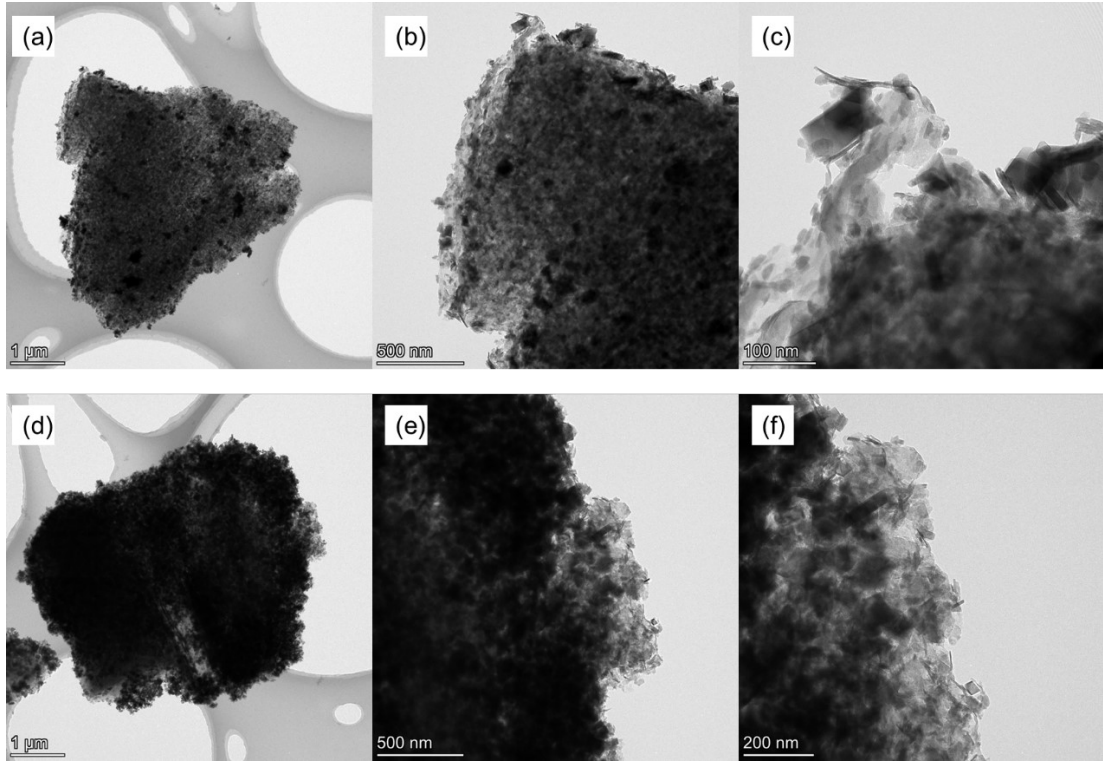

Figure S5. (a) (b) (c) and (a) (b) (c) are TEM images of 15% and 20% CIS/CN at different magnifications.

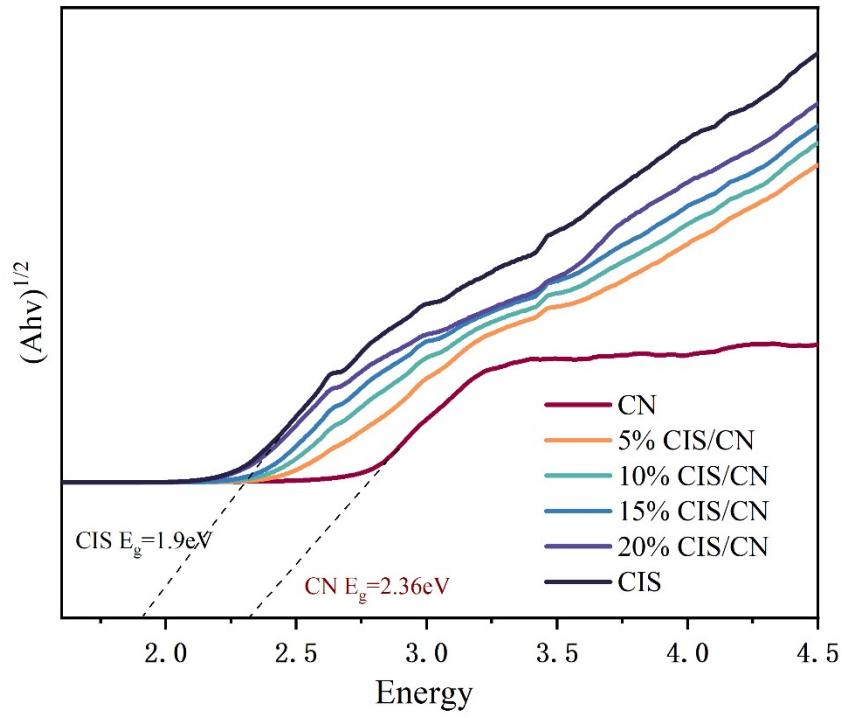

Figure S6. Plot of transferred Kubelka-Munk vs light absorbed energy of pure  $\text{CdIn}_2\text{S}_4$ ,  $\text{g-C}_3\text{N}_4$  and 5%, 10%, 15% and 20%  $\text{CdIn}_2\text{S}_4/\text{g-C}_3\text{N}_4$  heterojunction.



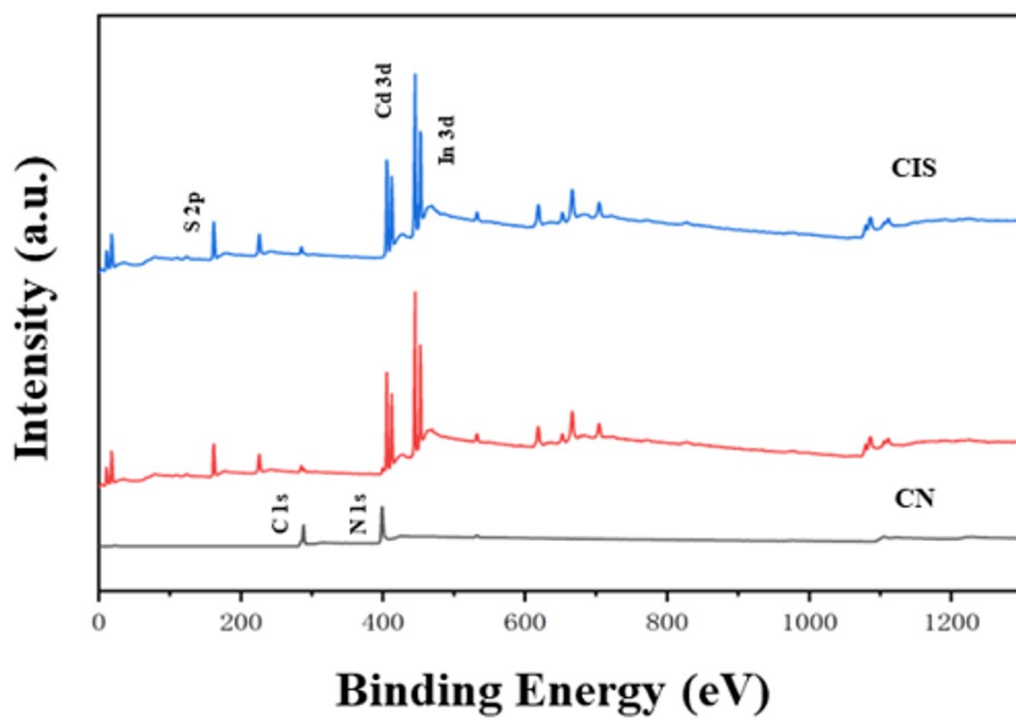

Figure S7. The survey scan spectra of XPS full spectrum.

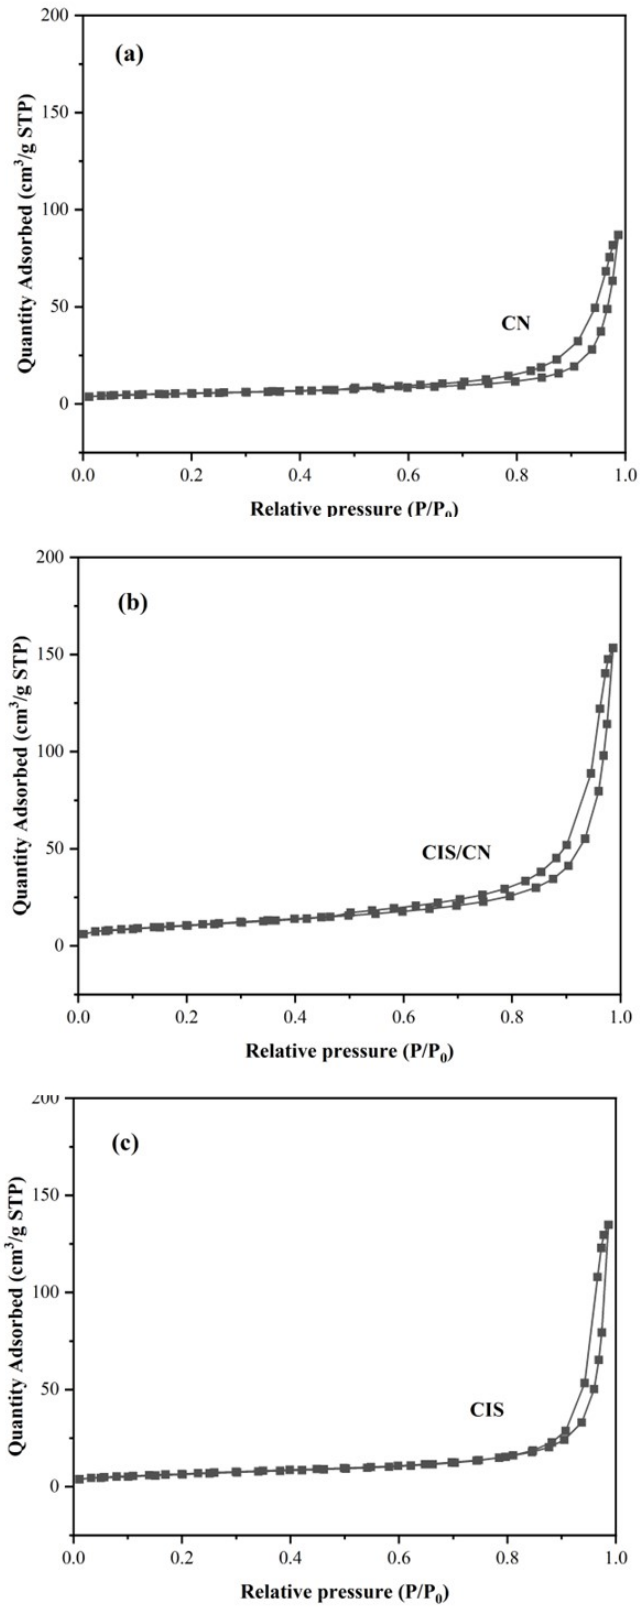

Figure S8.  $N_2$  adsorption-desorption isotherms for catalyst CN (a), 15% CIS/CN (b), and CIS (c)

Table S1. Comparison of conditions and photocatalytic activity of different carbon nitride-based catalysts for oxidation of 5-HMF

| Catalyst                                                        | Oxygen source                         | Solvent               | Substrate concentration | Con. of HMF | Sel. of DFF | Ref.         |
|-----------------------------------------------------------------|---------------------------------------|-----------------------|-------------------------|-------------|-------------|--------------|
| 15% CN/CIS                                                      | Air                                   | H <sub>2</sub> O      | 10 mM                   | 65.2%       | 91.5%       | This article |
| g-C <sub>3</sub> N <sub>4</sub>                                 | O <sub>2</sub> 10mL·min <sup>-1</sup> | ACN+PhCF <sub>3</sub> | 0.1 mM                  | 31.2%       | 85.6%       | 1            |
| Nb <sub>2</sub> O <sub>5</sub> /g-C <sub>3</sub> N <sub>4</sub> | O <sub>2</sub> 10mL·min <sup>-1</sup> | ACN+PhCF <sub>3</sub> | 0.1 mM                  | 25.1%       | 91.2%       | 2            |

Table S2. Structural parameters of the different catalysts

| Catalysts  | BET specific surface area ( m <sup>2</sup> /g ) | Total pore volume ( cm <sup>3</sup> /g ) | Average pore size ( nm ) |
|------------|-------------------------------------------------|------------------------------------------|--------------------------|
| CN         | 19.28                                           | 0.129                                    | 26.75                    |
| 15% CIS/CN | 38.77                                           | 0.231                                    | 23.87                    |
| CIS        | 24.37                                           | 0.199                                    | 32.65                    |

## References:

1. Q. Wu, Y. He, H. Zhang, Z. Feng, Y. Wu and T. Wu, *Molecular Catalysis*, 2017, **436**, 10-18.
2. H. Zhang, Q. Wu, C. Guo, Y. Wu and T. Wu, *ACS Sustainable Chemistry & Engineering*, 2017, **5**, 3517-3523.
